# Supplementary material for: Correlations between molecular structure and biological activity in "logical series" of dietary chromone derivatives
Source: PubMed Central journal article supplement (PMC7444502; doi:10.1371/journal.pone.0229477), 2020-08-21
Supplement: pone.0229477.s001.pdf [file pone.0229477.s001.pdf]

## Supporting information

Correlations between molecular structure and biological activity in "logical series" of dietary  
chromone derivatives

Short title: Structure and biological activity of chromone derivatives

Włodzimierz Lewandowski <sup>1, 1</sup>, Hanna Lewandowska <sup>2</sup>, Aleksandra Golonko <sup>3</sup>, Grzegorz Świdorski <sup>1</sup>,  
Renata Świsłocka <sup>1</sup>, Monika Kalinowska<sup>1, 1</sup>

1. Department of Chemistry, Biology and Biotechnology, Białystok University of Technology, Białystok, Poland

2. Institute of Nuclear Chemistry and Technology, Centre for Radiation Research and Technology, Warsaw,  
Poland

3. Department of Microbiology, Institute of Agricultural and Food Biotechnology, Warsaw, Poland;

\* Corresponding authors

E-mail: w-lewando@wp.pl (WL); m.kalinowska@pb.edu.pl (MK)

**Funding:** This work was funded by the National Science Centre, Poland under the research project number 2015/17/B/NZ9/03581 and work number WZ/WB-IIS/5/2020 financed from funds for the education of the Ministry of Science and Higher Education.

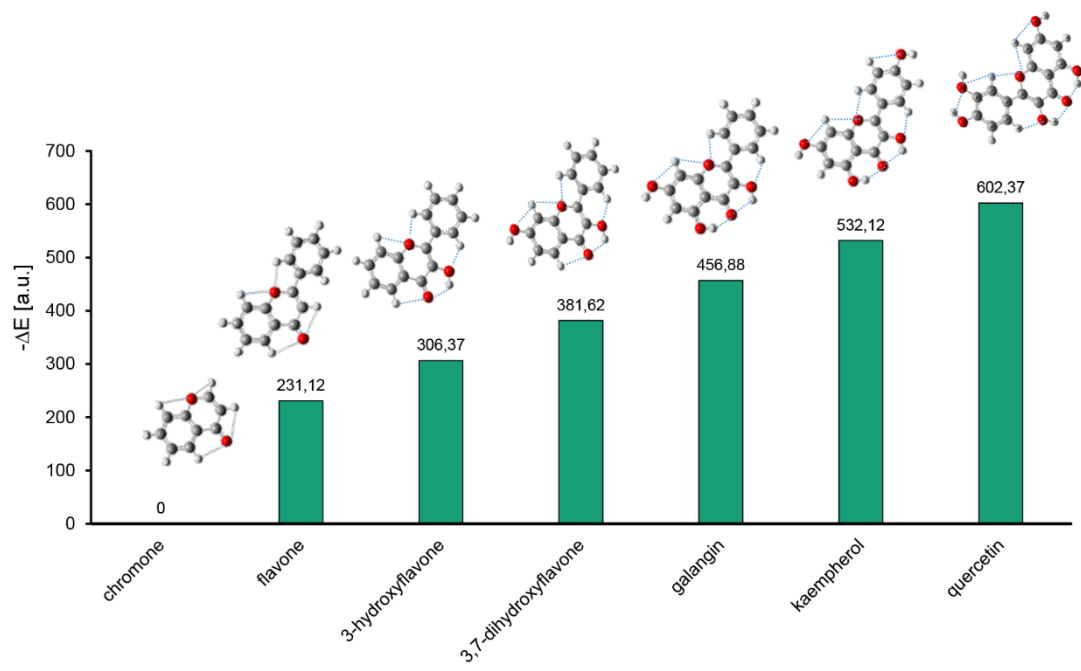

Fig S1. The energy of the most stable conformers of the studied compounds in relation to the energy of chromone.

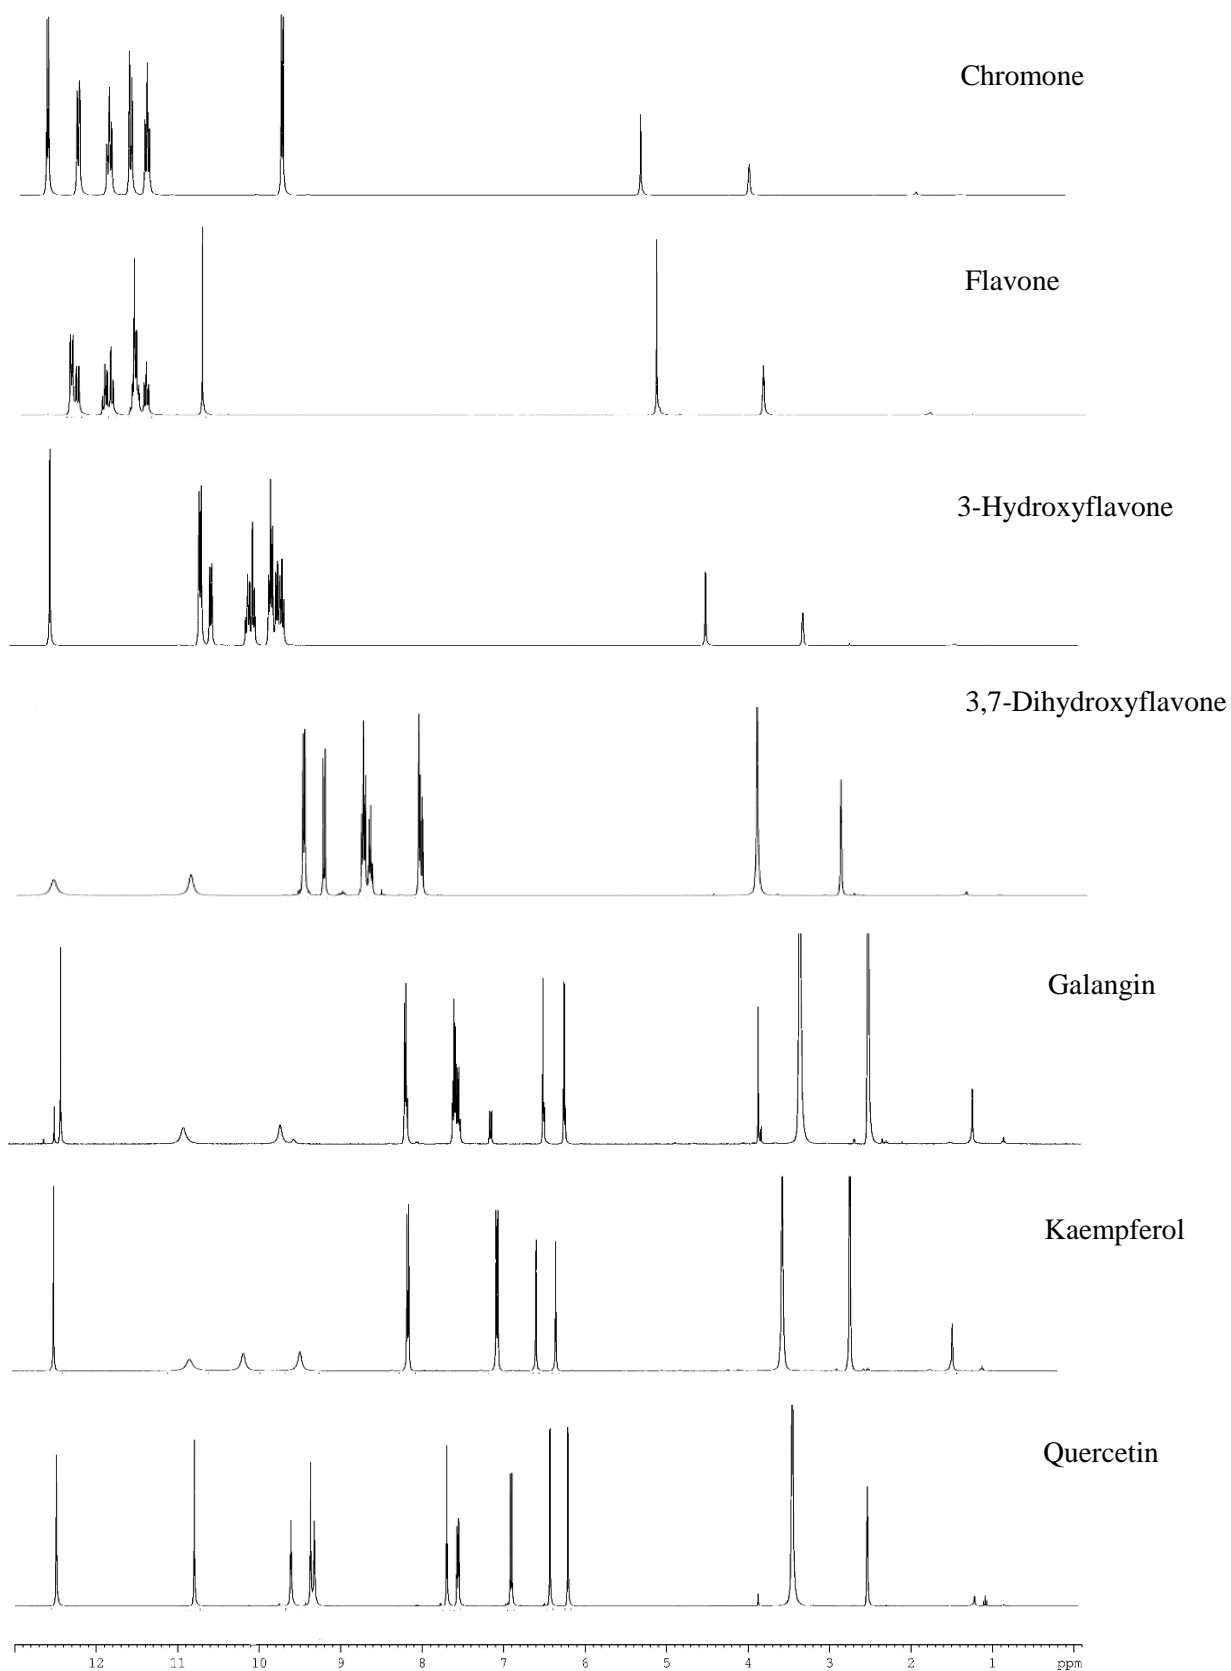

Fig S2. The <sup>1</sup>H NMR spectra of chromone derivatives.

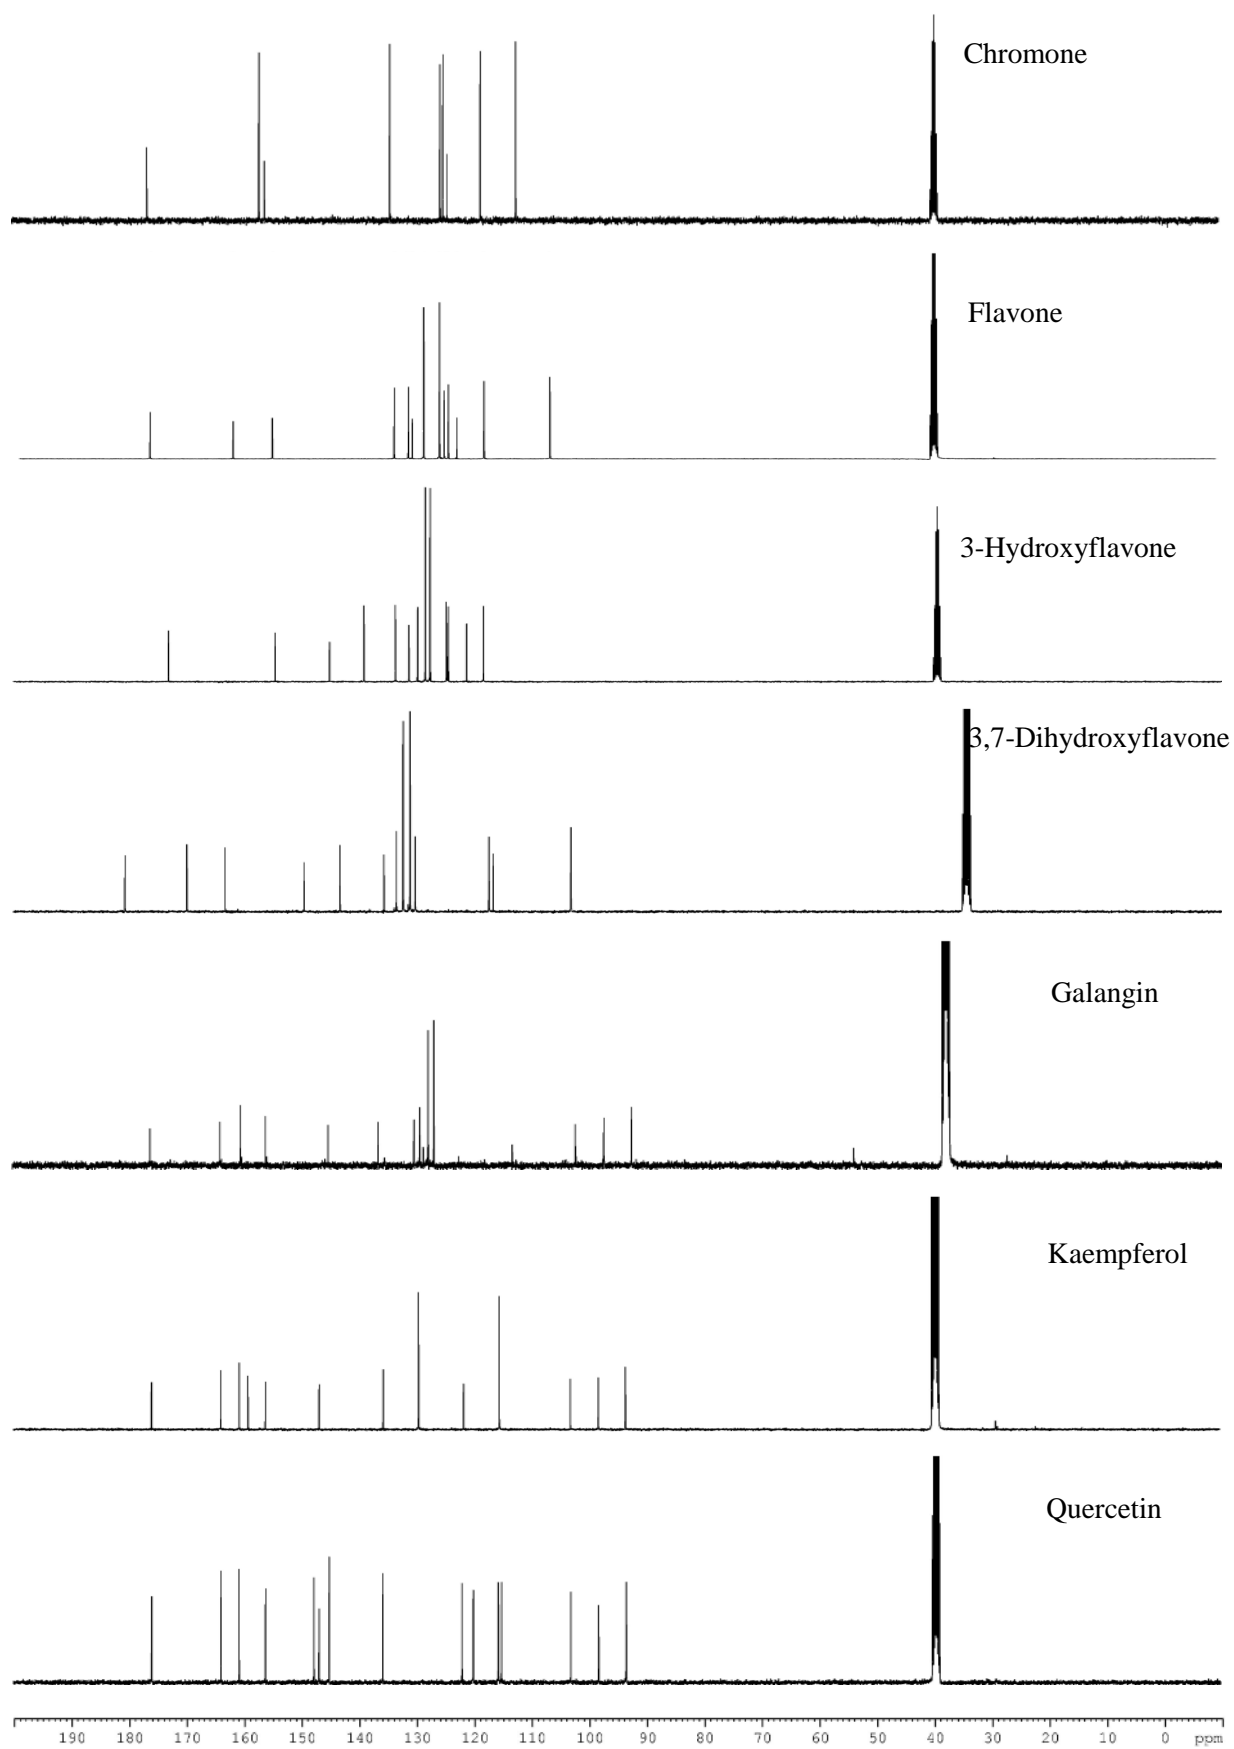

Fig S3. The  $^{13}\text{C}$  NMR spectra of chromone derivatives.

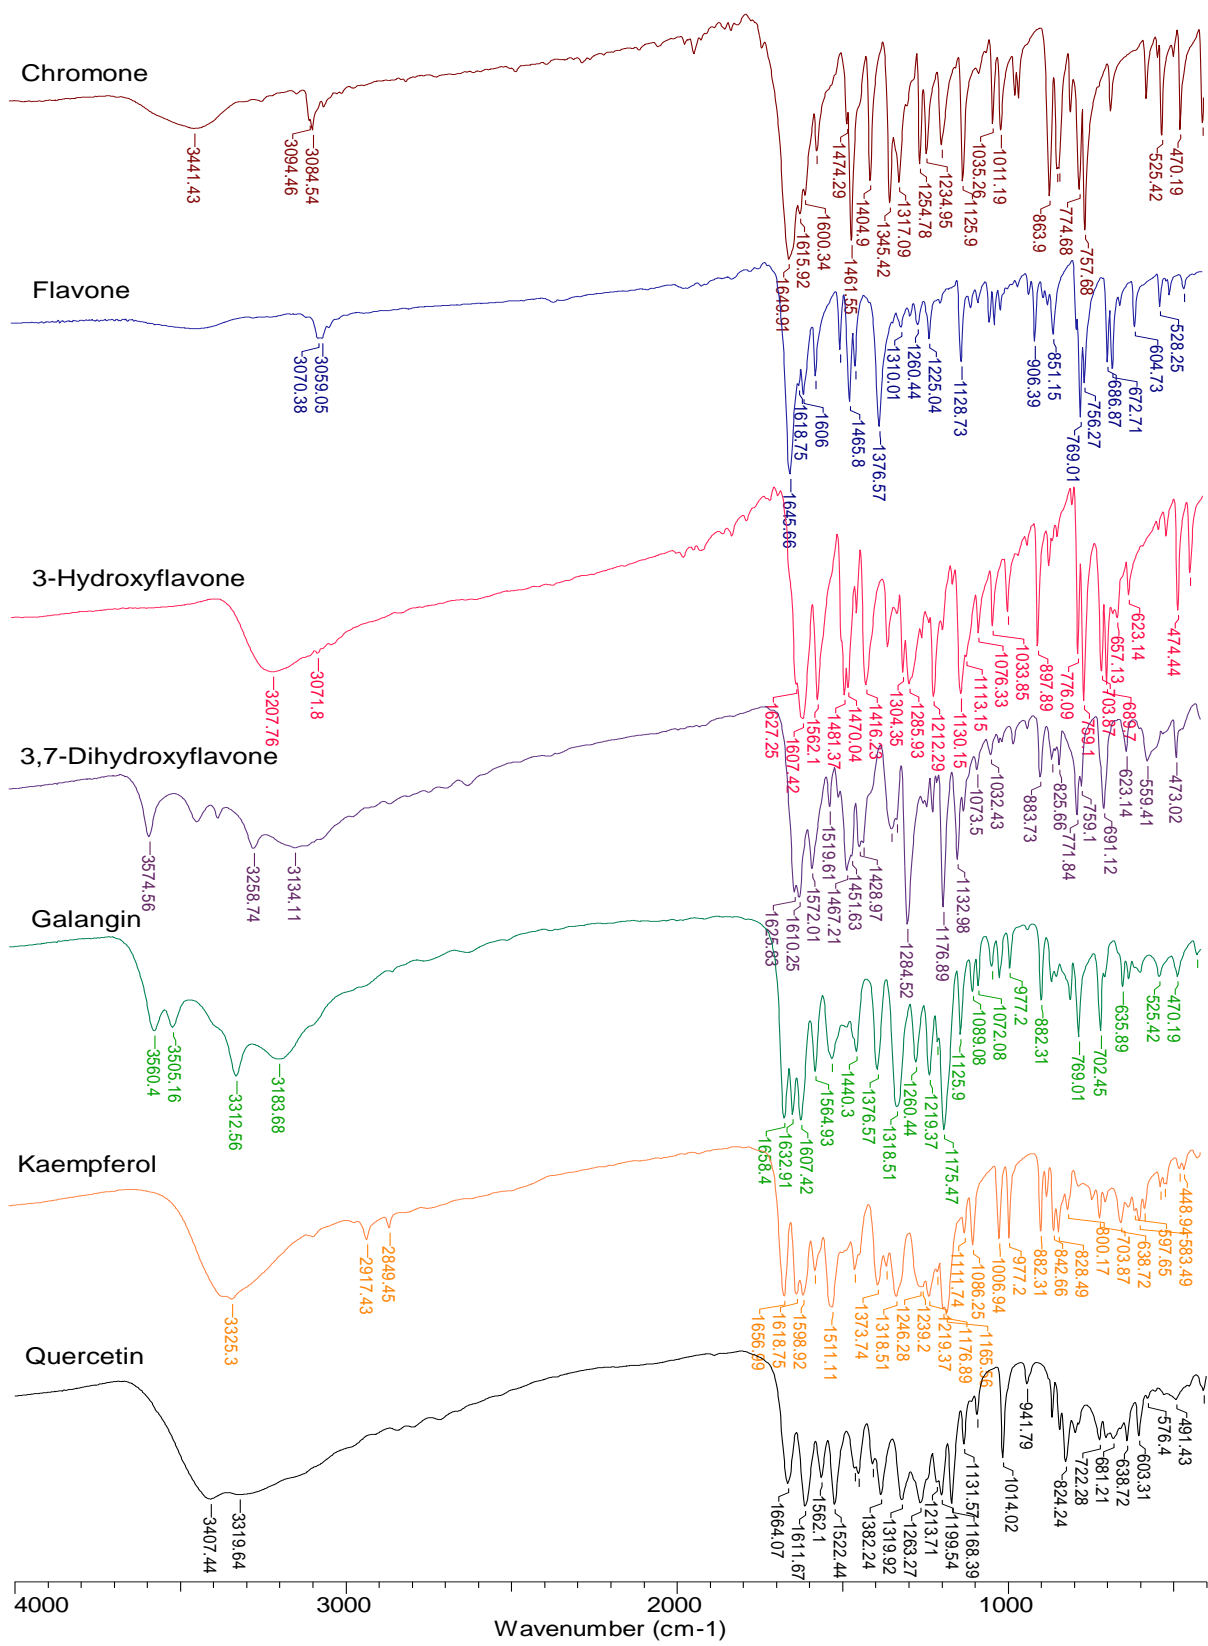

Fig S4. The IR spectra of chromone derivatives registered in the range of 400-4000  $\text{cm}^{-1}$ .

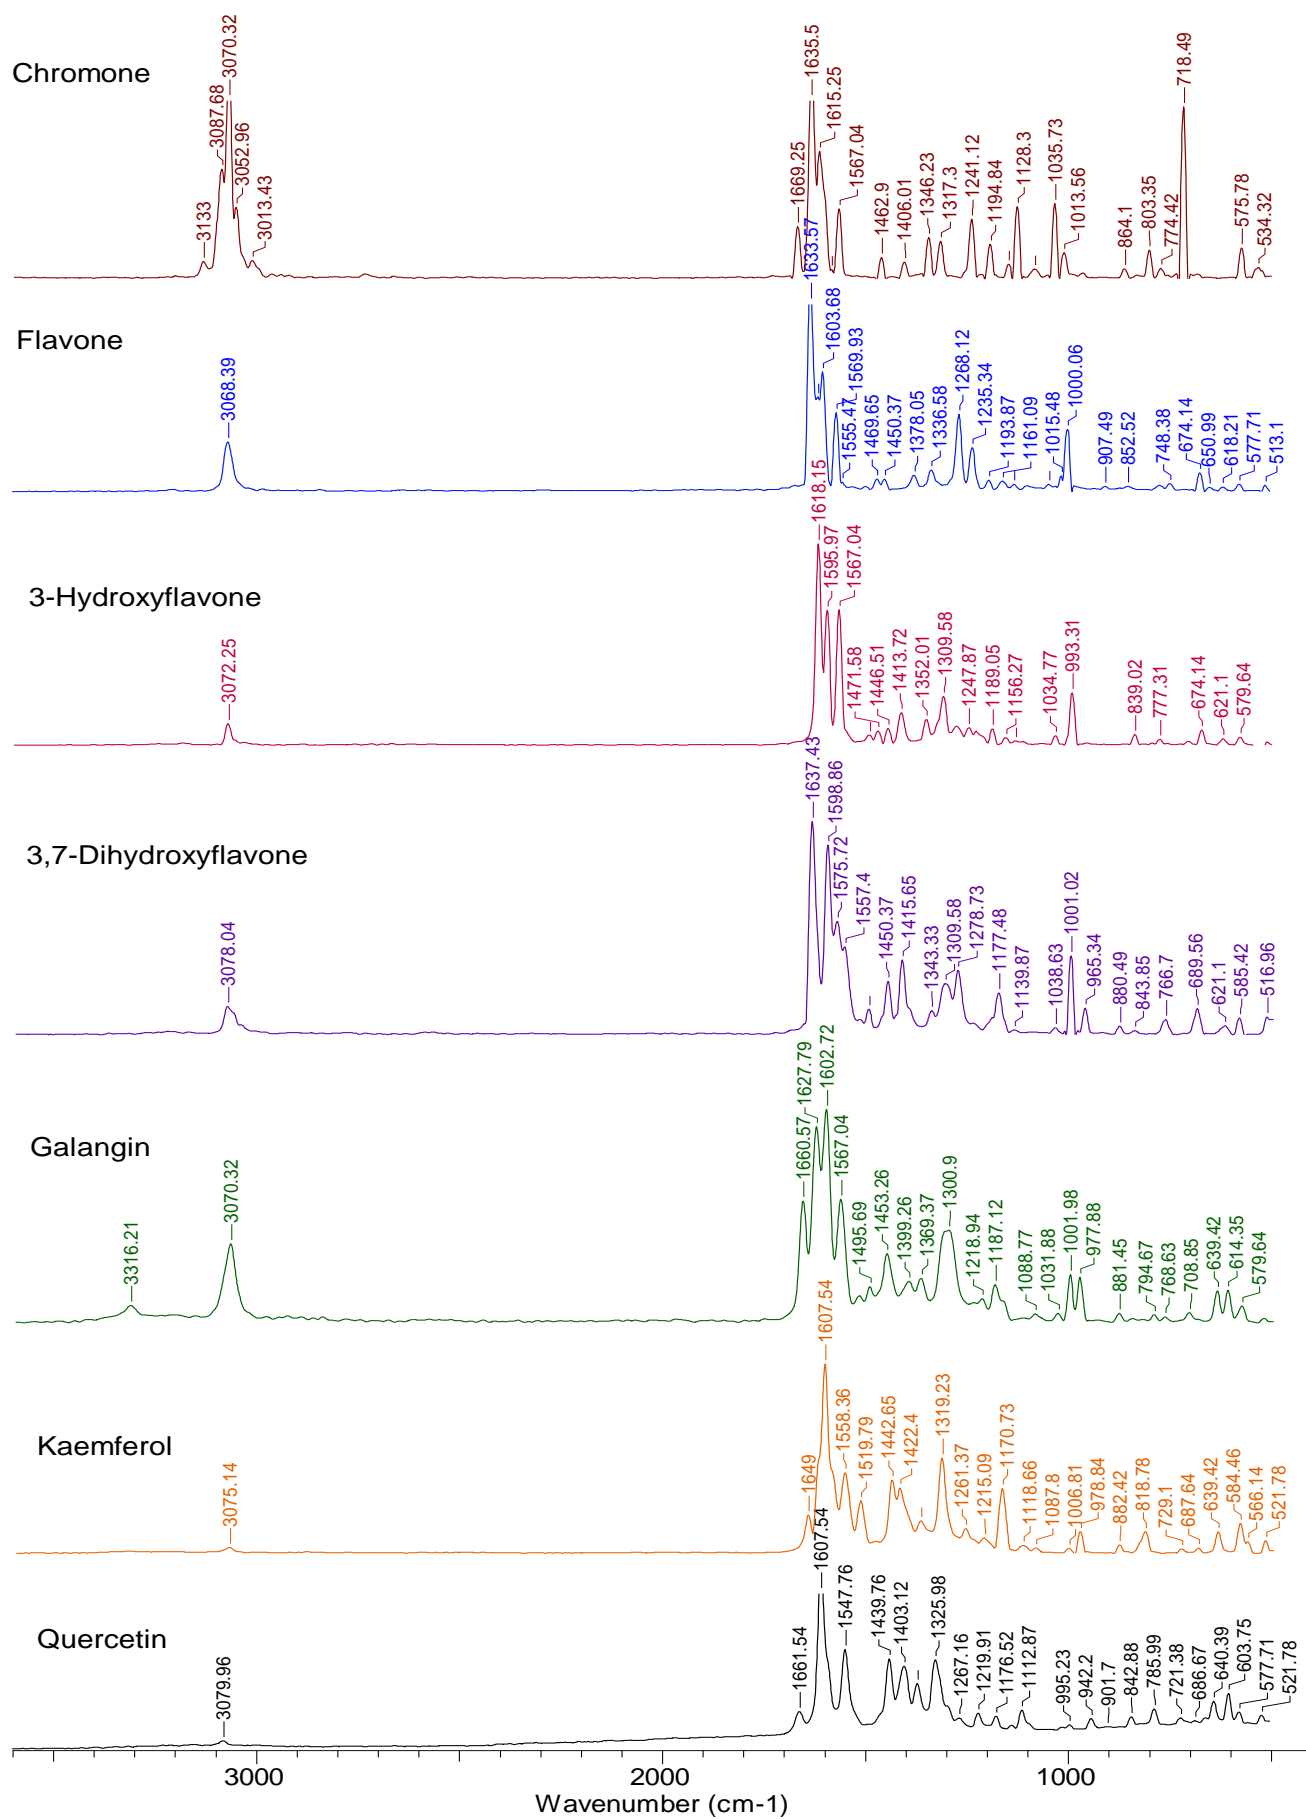

Fig S5. The Raman spectra of chromone derivatives registered in the range of 400-4000  $\text{cm}^{-1}$ .

Table S1. Selected bond lengths [Å] and angles [°] of 3-dihydroxyflavone conformers (atom numbering in Fig. 4)

| <b>Bond lengths [Å]</b>   | <b>Conformers of 3-dihydroxyflavone</b> |          |
|---------------------------|-----------------------------------------|----------|
|                           | <b>1</b>                                | <b>2</b> |
| C2-C1'                    | 1,476                                   | 1,472    |
| C2-C3                     | 1,363                                   | 1,363    |
| C3-O3                     | 1,360                                   | 1,355    |
| O3-H3                     | 0,965                                   | 0,975    |
| C3-C4                     | 1,472                                   | 1,458    |
| C4=O4                     | 1,222                                   | 1,232    |
| C4-C10                    | 1,475                                   | 1,463    |
| C9-C10                    | 1,398                                   | 1,400    |
| C8-C9                     | 1,399                                   | 1,399    |
| C7-C8                     | 1,384                                   | 1,384    |
| C6-C7                     | 1,405                                   | 1,406    |
| C5-C6                     | 1,382                                   | 1,382    |
| C1'-C2'                   | 1,404                                   | 1,403    |
| C2'-C3'                   | 1,490                                   | 1,391    |
| C3'-C4'                   | 1,395                                   | 1,394    |
| C4'-C5'                   | 1,393                                   | 1,394    |
| C5'-C6'                   | 1,404                                   | 1,391    |
| C6'-C1'                   | 1,404                                   | 1,402    |
| C6-O1                     | 1,363                                   | 1,393    |
| O1-C5                     | 1,370                                   | 1,369    |
| <b>Hydrogen bonds [Å]</b> |                                         |          |
| O1...H2'                  | 2,591                                   | 2,469    |
| O1...H8                   | 2,557                                   | 2,556    |
| O4...H5                   | 2,565                                   | 2,633    |
| O3...H3                   | -                                       | 2,057    |
| O2-H6'                    | 2,691                                   | 2,397    |

Table S2. The NBO atomic charges [e] calculated for 3-dihydroxyflavone conformers (atom numbering in Fig. 4)

|             |                     | <b>Conformers of 3-dihydroxyflavone</b> |          |
|-------------|---------------------|-----------------------------------------|----------|
| <b>Ring</b> | <b>Atom</b>         | <b>1</b>                                | <b>2</b> |
| <b>A</b>    | C8                  | -0,235                                  | -0,233   |
|             | C9                  | 0,341                                   | 0,346    |
|             | C10                 | -0,182                                  | -0,183   |
|             | C5                  | -0,144                                  | -0,144   |
|             | C6                  | -0,214                                  | -0,213   |
|             | C7                  | -0,171                                  | -0,169   |
|             | <b>Total charge</b> |                                         | -0,605   |
| <b>C</b>    | O1                  | -0,489                                  | -0,481   |
|             | C2                  | 0,270                                   | 0,303    |
|             | C3                  | 0,203                                   | 0,200    |
|             | C4                  | 0,466                                   | 0,455    |
|             | C10                 | -0,182                                  | -0,183   |
|             | C9                  | 0,341                                   | 0,346    |
|             | <b>Total charge</b> |                                         | 0,609    |
| <b>B</b>    | 3'C                 | -0,199                                  | -0,209   |
|             | 4'C                 | -0,189                                  | -0,188   |
|             | 5'C                 | -0,201                                  | -0,207   |
|             | 6'C                 | -0,198                                  | -0,151   |
|             | C1'                 | -0,099                                  | -0,097   |
|             | C2'                 | -0,157                                  | -0,159   |
|             | <b>Total charge</b> |                                         | -1,043   |
|             | O1                  | -0,489                                  | -0,481   |
|             | O3                  | -0,652                                  | -0,674   |
|             | O4                  | -0,564                                  | -0,619   |

$$e = 1,602 \cdot 10^{-19} \text{ C}$$



Table S3. Selected bond lengths [Å] and angles [°] of 3,7-dihydroxyflavone conformers (atom numbering in Fig. 4)

| <b>Bond lengths [Å]</b>   | <b>Conformers of 3,7-dihydroxyflavone</b> |          |          |          |
|---------------------------|-------------------------------------------|----------|----------|----------|
|                           | <b>1</b>                                  | <b>2</b> | <b>3</b> | <b>4</b> |
| C1'-C7                    | 1,475                                     | 1,468    | 1,468    | 1,475    |
| C2-C3                     | 1,361                                     | 1,366    | 1,365    | 1,361    |
| C3-O3                     | 1,360                                     | 1,353    | 1,352    | 1,359    |
| O3-H3                     | 0,965                                     | 0,979    | 0,978    | 0,965    |
| C2-C4                     | 1,474                                     | 1,462    | 1,463    | 1,475    |
| C4=O4                     | 1,223                                     | 1,238    | 1,238    | 1,223    |
| C4-C10                    | 1,470                                     | 1,451    | 1,450    | 1,470    |
| C9-C10                    | 1,401                                     | 1,403    | 1,400    | 1,397    |
| C8-C9                     | 1,395                                     | 1,395    | 1,398    | 1,398    |
| C7-C8                     | 1,387                                     | 1,387    | 1,388    | 1,388    |
| C7-O7                     | 1,363                                     | 1,362    | 1,361    | 1,363    |
| O7-H7                     | 0,963                                     | 0,963    | 0,963    | 0,963    |
| C6-C7                     | 1,409                                     | 1,410    | 1,410    | 1,408    |
| C5-C6                     | 1,380                                     | 1,378    | 1,376    | 1,377    |
| C5-C10                    | 1,405                                     | 1,406    | 1,410    | 1,408    |
| C1'-C2'                   | 1,404                                     | 1,408    | 1,408    | 1,404    |
| C2'-C3'                   | 1,390                                     | 1,389    | 1,390    | 1,390    |
| C3'-C4'                   | 1,395                                     | 1,394    | 1,394    | 1,396    |
| C4'-C5'                   | 1,393                                     | 1,393    | 1,393    | 1,393    |
| C5'-C6'                   | 1,393                                     | 1,391    | 1,391    | 1,393    |
| C6'-C1'                   | 1,404                                     | 1,408    | 1,408    | 1,404    |
| C9-O1                     | 1,361                                     | 1,356    | 1,356    | 1,361    |
| O1-C2                     | 1,373                                     | 1,376    | 1,377    | 1,374    |
| <b>Hydrogen bonds [Å]</b> |                                           |          |          |          |
| O4...H3                   | -                                         | 1,978    | 1,974    | -        |
| O3...H6'                  | 2,678                                     | 2,157    | 2,157    | 2,688    |
| O1...H2'                  | 2,578                                     | 2,309    | 2,313    | 2,590    |
| H8...O7                   | 2,581                                     | 2,576    | 2,702    | 2,704    |
| O1...H8                   | 2,569                                     | 2,571    | 2,551    | 2,550    |
| O4...H5                   | 2,572                                     | 2,653    | 2,658    | 2,577    |

Table S4. The NBO atomic charges [e] calculated for 3,7-dihydroxyflavone conformers (atom numbering in Fig. 4)

|             |                     | <b>Conformers of 3,7-dihydroxyflavone</b> |          |          |          |
|-------------|---------------------|-------------------------------------------|----------|----------|----------|
| <b>Ring</b> | <b>Atom</b>         | <b>1</b>                                  | <b>2</b> | <b>3</b> | <b>4</b> |
| <b>A</b>    | C8                  | -0,291                                    | -0,295   | -0,322   | -0,324   |
|             | C9                  | 0,363                                     | 0,376    | 0,377    | 0,364    |
|             | C10                 | -0,208                                    | -0,208   | -0,222   | -0,208   |
|             | C5                  | -0,123                                    | -0,122   | -0,110   | -0,124   |
|             | C6                  | -0,285                                    | -0,284   | -0,261   | -0,255   |
|             | C7                  | 0,344                                     | 0,347    | 0,350    | 0,347    |
|             | <b>Total charge</b> |                                           | -0,200   | -0,186   | -0,188   |
| <b>C</b>    | O1                  | -0,489                                    | -0,485   | -0,488   | -0,492   |
|             | C2                  | 0,266                                     | 0,311    | 0,312    | 0,268    |
|             | C3                  | 0,205                                     | 0,210    | 0,198    | 0,207    |
|             | C4                  | 0,467                                     | 0,448    | 0,461    | 0,465    |
|             | C10                 | -0,208                                    | -0,208   | -0,222   | -0,208   |
|             | C9                  | 0,363                                     | 0,376    | 0,377    | 0,364    |
|             | <b>Total charge</b> |                                           | 0,604    | 0,652    | 0,638    |
| <b>B</b>    | C3'                 | -0,199                                    | -0,201   | -0,201   | -0,199   |
|             | C4'                 | -0,190                                    | -0,189   | -0,190   | -0,190   |
|             | C5'                 | -0,201                                    | -0,206   | -0,205   | -0,201   |
|             | C6'                 | -0,199                                    | -0,159   | -0,159   | -0,199   |
|             | C1'                 | -0,093                                    | -0,115   | -0,114   | -0,098   |
|             | C2'                 | -0,157                                    | -0,174   | -0,176   | -0,158   |
|             | <b>Total charge</b> |                                           | -1,039   | -1,044   | -1,045   |
|             | O3                  | -0,652                                    | -0,679   | -0,679   | -0,652   |
|             | O4                  | -0,570                                    | -0,634   | -0,631   | -0,569   |
|             | 7O                  | -0,663                                    | -0,660   | -0,659   | -0,662   |

$$e = 1,602 \cdot 10^{-19} \text{ C}$$

Table S5. Selected bond lengths [Å] and angles [°] of galangin conformers (atom numbering in Fig. 4)

| <b>Bond lengths [Å]</b>   | <b>Conformers of galangin</b> |          |          |          |          |          |          |          |
|---------------------------|-------------------------------|----------|----------|----------|----------|----------|----------|----------|
|                           | <b>1</b>                      | <b>2</b> | <b>3</b> | <b>4</b> | <b>5</b> | <b>6</b> | <b>7</b> | <b>8</b> |
| C3-OH                     | 1,359                         | 1,360    | 1,360    | 1,364    | 1,359    | 1,350    | 1,354    | 1,354    |
| H3-O3                     | 0,965                         | 0,965    | 0,965    | 0,966    | 0,965    | 0,982    | 0,977    | 0,977    |
| C4=O4                     | 1,242                         | 1,242    | 1,241    | 1,233    | 1,219    | 1,235    | 1,255    | 1,256    |
| C5-OH                     | 1,338                         | 1,338    | 1,338    | 1,356    | 1,352    | 1,351    | 1,340    | 1,341    |
| H5-O5                     | 0,993                         | 0,993    | 0,991    | 0,966    | 0,964    | 0,964    | 0,985    | 0,986    |
| C7-OH                     | 1,361                         | 1,361    | 1,361    | 1,358    | 1,362    | 1,361    | 1,360    | 1,360    |
| C1'-C2                    | 1,475                         | 1,475    | 1,475    | 1,475    | 1,475    | 1,467    | 1,467    | 1,467    |
| C2-C3                     | 1,362                         | 1,362    | 1,362    | 1,358    | 1,356    | 1,361    | 1,367    | 1,367    |
| C3-C4                     | 1,465                         | 1,465    | 1,466    | 1,472    | 1,482    | 1,471    | 1,453    | 1,452    |
| C4-C10                    | 1,448                         | 1,448    | 1,449    | 1,465    | 1,476    | 1,454    | 1,432    | 1,433    |
| C10-C5                    | 1,424                         | 1,424    | 1,427    | 1,426    | 1,420    | 1,423    | 1,425    | 1,422    |
| <b>Hydrogen bonds [Å]</b> |                               |          |          |          |          |          |          |          |
| C4=O...HO-C5              | 1,702                         | 1,702    | 1,710    | -        | -        | -        | 1,778    | 1,771    |
| C3-OH...O=C4              | -                             | -        | -        | -        | -        | 1,920    | 2,006    | 2,011    |

Table S6. The NBO atomic charges [e] calculated for galangin conformers (atom numbering in Fig. 4)

|      |                     | Conformers of galangin |        |        |        |        |        |        |        |
|------|---------------------|------------------------|--------|--------|--------|--------|--------|--------|--------|
| Ring | Atom                | 1                      | 2      | 3      | 4      | 5      | 6      | 7      | 8      |
| A    | C8                  | -0,332                 | -0,332 | -0,363 | -0,347 | -0,323 | -0,352 | -0,360 | -0,329 |
|      | C9                  | 0,380                  | 0,380  | 0,381  | 0,383  | 0,381  | 0,394  | 0,393  | 0,391  |
|      | C10                 | -0,265                 | -0,265 | -0,264 | -0,257 | -0,255 | -0,254 | -0,269 | -0,270 |
|      | C5                  | 0,404                  | 0,404  | 0,403  | 0,401  | 0,408  | 0,389  | 0,402  | 0,398  |
|      | C6                  | -0,352                 | -0,352 | -0,352 | -0,352 | -0,384 | -0,334 | -0,321 | -0,337 |
|      | C7                  | 0,369                  | 0,369  | 0,369  | 0,368  | 0,360  | 0,360  | 0,372  | 0,366  |
|      | <b>Total charge</b> |                        | -0,265 | -0,265 | -0,264 | -0,257 | -0,255 | -0,254 | -0,269 |
| C    | O1                  | -0,483                 | -0,483 | -0,485 | -0,483 | -0,489 | -0,491 | -0,486 | -0,481 |
|      | C2                  | 0,280                  | 0,280  | 0,277  | 0,289  | 0,261  | 0,290  | 0,313  | 0,327  |
|      | C3                  | 0,207                  | 0,206  | 0,208  | 0,197  | 0,210  | 0,206  | 0,202  | 0,198  |
|      | C4                  | 0,463                  | 0,463  | 0,463  | 0,465  | 0,463  | 0,462  | 0,456  | 0,455  |
|      | C10                 | -0,265                 | -0,265 | -0,264 | -0,257 | -0,255 | -0,254 | -0,269 | -0,270 |
|      | C9                  | 0,380                  | 0,380  | 0,381  | 0,383  | 0,381  | 0,394  | 0,393  | 0,391  |
|      | <b>Total charge</b> |                        | 0,582  | 0,581  | 0,580  | 0,594  | 0,571  | 0,607  | 0,609  |
| B    | C3'                 | -0,198                 | -0,198 | -0,199 | -0,204 | -0,199 | -0,200 | -0,208 | -0,203 |
|      | C4'                 | -0,188                 | -0,188 | -0,188 | -0,190 | -0,192 | -0,192 | -0,186 | -0,186 |
|      | C5'                 | -0,201                 | -0,201 | -0,201 | -0,204 | -0,201 | -0,206 | -0,206 | -0,206 |
|      | C6'                 | -0,198                 | -0,198 | -0,197 | 0,194  | -0,196 | -0,163 | -0,160 | -0,157 |
|      | C1'                 | -0,101                 | -0,101 | -0,101 | -0,109 | -0,112 | -0,099 | -0,104 | -0,118 |
|      | C2'                 | -0,156                 | -0,156 | -0,156 | -0,161 | -0,156 | -0,167 | -0,162 | -0,172 |
|      | <b>Total charge</b> |                        | -1,042 | -1,042 | -1,042 | -1,062 | -1,056 | -1,027 | -1,026 |
|      | O1                  | -0,483                 | -0,483 | -0,485 | -0,483 | -0,489 | -0,491 | -0,486 | -0,481 |
|      | O3                  | -0,652                 | -0,652 | -0,651 | -0,681 | -0,652 | -0,680 | -0,676 | -0,676 |
|      | O4                  | -0,621                 | -0,621 | -0,619 | -0,635 | -0,541 | -0,607 | -0,685 | -0,687 |
|      | O5                  | -0,670                 | -0,670 | -0,667 | -0,657 | -0,625 | -0,628 | -0,665 | -0,668 |
|      | O7                  | -0,660                 | -0,660 | -0,658 | -0,674 | -0,660 | -0,660 | -0,655 | -0,657 |

e = 1,602\*10<sup>-19</sup> C

Table S7. Selected bond lengths [ $\text{\AA}$ ] and angles [ $^\circ$ ] of kaempferol conformers (atom numbering in Fig. 4)

| <b>Bond lengths [<math>\text{\AA}</math>]</b>   | <b>Conformers of kaempferol</b> |          |          |          |          |
|-------------------------------------------------|---------------------------------|----------|----------|----------|----------|
|                                                 | <b>1</b>                        | <b>2</b> | <b>3</b> | <b>4</b> | <b>5</b> |
| C4'-OH                                          | 1,363                           | 1,364    | 1,364    | 1,364    | 1,364    |
| C3-OH                                           | 1,361                           | 1,357    | 1,356    | 1,356    | 1,356    |
| C4=O                                            | 1,243                           | 1,257    | 1,256    | 1,256    | 1,256    |
| C5-OH                                           | 1,338                           | 1,341    | 1,341    | 1,340    | 1,340    |
| C7-OH                                           | 1,361                           | 1,360    | 1,360    | 1,361    | 1,361    |
| C1'-C2                                          | 1,472                           | 1,463    | 1,463    | 1,463    | 1,463    |
| <b>Hydrogen bonds [<math>\text{\AA}</math>]</b> |                                 |          |          |          |          |
| C4=O...HO-C5                                    | 1,700                           | 1,768    | 1,771    | 1,767    | 1,774    |
| C3-OH...O=C4                                    | -                               | 2,017    | 2,012    | 2,018    | 2,014    |

Table S8. The NBO atomic charges [e] calculated for kaempherol conformers (atom numbering in Fig. 4)

| Ring     | Atom                | Conformers of kaempherol |        |        |        |        |
|----------|---------------------|--------------------------|--------|--------|--------|--------|
|          |                     | 1                        | 2      | 3      | 4      | 5      |
| <b>A</b> | C8                  | -0.223                   | -0.334 | -0.349 | -0.330 | -0.361 |
|          | C9                  | 0.380                    | 0.390  | 0.386  | 0.390  | 0.392  |
|          | C10                 | -0.265                   | -0.262 | -0.261 | -0.269 | -0.268 |
|          | C5                  | 0.404                    | 0.396  | 0.401  | 0.403  | 0.402  |
|          | C6                  | -0.353                   | -0.337 | -0.321 | -0.351 | -0.321 |
|          | C7                  | 0.368                    | 0.365  | 0.367  | 0.370  | 0.371  |
|          | <b>Total charge</b> |                          | 0.311  | 0.218  | 0.223  | 0.213  |
| <b>C</b> | O1                  | -0.484                   | -0.484 | -0.488 | -0.484 | -0.489 |
|          | C2                  | 0.286                    | 0.330  | 0.326  | 0.333  | 0.318  |
|          | C3                  | 0.200                    | 0.204  | 0.205  | 0.190  | 0.194  |
|          | C4                  | 0.464                    | 0.438  | 0.439  | 0.453  | 0.454  |
|          | C9                  | 0.380                    | 0.390  | 0.386  | 0.390  | 0.392  |
|          | C10                 | -0.265                   | -0.262 | -0.261 | -0.269 | -0.268 |
|          | <b>Total charge</b> |                          | 0.581  | 0.616  | 0.607  | 0.613  |
| <b>B</b> | C1'                 | -0.133                   | -0.147 | -0.147 | -0.146 | -0.133 |
|          | C2'                 | -0.133                   | -0.149 | -0.150 | -0.159 | -0.138 |
|          | C3'                 | -0.246                   | -0.247 | -0.247 | -0.262 | -0.287 |
|          | C4'                 | 0.329                    | 0.332  | 0.332  | 0.327  | 0.331  |
|          | C5'                 | -0.283                   | -0.285 | -0.285 | -0.253 | -0.254 |
|          | C6'                 | -0.171                   | -0.134 | -0.134 | -0.135 | -0.137 |
|          | <b>Total charge</b> |                          | -0.637 | -0.630 | -0.631 | -0.628 |
|          | O1                  | -0.484                   | -0.484 | -0.488 | -0.484 | -0.489 |
|          | O3                  | -0.656                   | -0.682 | -0.680 | -0.680 | -0.679 |
|          | O4                  | -0.626                   | -0.692 | -0.690 | -0.690 | -0.688 |
|          | O5                  | -0.670                   | -0.669 | -0.665 | -0.668 | -0.666 |
|          | O7                  | -0.660                   | -0.658 | -0.657 | -0.658 | -0.656 |
|          | O4'                 | -0.663                   | -0.664 | -0.664 | -0.664 | -0.664 |

$$e = 1,602 \cdot 10^{-19} \text{ C}$$

Table S9. Selected bond lengths [Å] and angles [°] of quercetin conformers (atom numbering Fig. 4)

| <b>Bond lengths [Å]</b>   | <b>Conformers of quercetin</b> |          |          |          |          |          |
|---------------------------|--------------------------------|----------|----------|----------|----------|----------|
|                           | <b>1</b>                       | <b>2</b> | <b>3</b> | <b>4</b> | <b>5</b> | <b>6</b> |
| O3-H3                     | 0,977                          | 0,977    | 0,977    | 0,966    | 0,982    | 0,965    |
| O3-C3                     | 1,355                          | 1,356    | 1,355    | 1,360    | 1,352    | 1,359    |
| C3-C4                     | 1,449                          | 1,450    | 1,450    | 1,463    | 1,467    | 1,481    |
| C4=O4                     | 1,256                          | 1,257    | 1,256    | 1,246    | 1,236    | 1,220    |
| C4-C10                    | 1,434                          | 1,433    | 1,434    | 1,449    | 1,456    | 1,476    |
| C10-C5                    | 1,422                          | 1,422    | 1,425    | 1,424    | 1,420    | 1,420    |
| C5-O5                     | 1,340                          | 1,341    | 1,340    | 1,338    | 1,352    | 1,352    |
| O5-H5                     | 0,987                          | 0,987    | 0,986    | 0,993    | 0,964    | 0,964    |
| <b>Hydrogen bonds [Å]</b> |                                |          |          |          |          |          |
| H3...O4                   | 2,019                          | 2,012    | 2,014    | -        | 1,929    | -        |
| O4...H5                   | 1,766                          | 1,769    | 1,772    | 1,699    | -        | -        |
| H6...O5                   | 2,589                          | 2,590    | 2,608    | 2,582    | 2,641    | 2,629    |
| H6...O7                   | 2,684                          | 2,682    | 2,560    | 2,685    | 2,673    | 2,673    |

Table S10. The NBO atomic charges [e] calculated for quercetin conformers (atom numbering Fig. 4)

|          |                     | Conformers of quercetin |        |        |        |        |        |
|----------|---------------------|-------------------------|--------|--------|--------|--------|--------|
| Ring     |                     | 1                       | 2      | 3      | 4      | 5      | 6      |
| <b>A</b> | C8                  | -0,318                  | -0,317 | -0,350 | -0,334 | -0,322 | -0,324 |
|          | C9                  | 0,385                   | 0,387  | 0,385  | 0,380  | 0,393  | 0,379  |
|          | C10                 | -0,262                  | -0,270 | -0,261 | -0,265 | -0,254 | -0,247 |
|          | C5                  | 0,403                   | 0,403  | 0,402  | 0,404  | 0,390  | 0,388  |
|          | C6                  | -0,351                  | -0,351 | -0,321 | -0,350 | -0,362 | -0,362 |
|          | C7                  | 0,366                   | 0,366  | 0,366  | 0,368  | 0,357  | 0,354  |
|          | <b>Total charge</b> |                         | 0,223  | 0,218  | 0,221  | 0,203  | 0,202  |
| <b>C</b> | O1                  | -0,491                  | -0,487 | -0,494 | -0,490 | -0,497 | -0,497 |
|          | C2                  | 0,314                   | 0,320  | 0,311  | 0,283  | 0,297  | 0,254  |
|          | C3                  | 0,208                   | 0,195  | 0,210  | 0,204  | 0,198  | 0,214  |
|          | C4                  | 0,437                   | 0,453  | 0,438  | 0,463  | 0,460  | 0,462  |
|          | C9                  | 0,385                   | 0,387  | 0,385  | 0,380  | 0,393  | 0,379  |
|          | C10                 | -0,262                  | -0,270 | -0,261 | -0,265 | -0,254 | -0,247 |
|          | <b>Total charge</b> |                         | 0,853  | 0,868  | 0,850  | 0,840  | 0,851  |
| <b>B</b> | C1'                 | -0,114                  | -0,109 | -0,113 | -0,111 | -0,109 | -0,107 |
|          | C2'                 | -0,229                  | -0,201 | -0,231 | -0,225 | -0,234 | -0,227 |
|          | C3'                 | 0,248                   | 0,274  | 0,248  | 0,256  | 0,248  | 0,255  |
|          | C4'                 | 0,295                   | 0,265  | 0,294  | 0,291  | 0,289  | 0,287  |
|          | C5'                 | -0,243                  | -0,271 | -0,242 | -0,238 | -0,242 | -0,238 |
|          | C6'                 | -0,160                  | -0,167 | -0,161 | -0,202 | -0,164 | -0,203 |
|          | <b>Total charge</b> |                         | -0,203 | -0,209 | -0,205 | -0,229 | -0,212 |
|          | O1                  | -0,491                  | -0,487 | -0,494 | -0,490 | -0,497 | -0,497 |
|          | O3                  | -0,679                  | -0,679 | -0,679 | -0,653 | -0,682 | -0,652 |
|          | O4                  | -0,688                  | -0,691 | -0,686 | -0,622 | -0,610 | -0,545 |
|          | O5                  | -0,668                  | -0,669 | -0,665 | -0,670 | -0,627 | -0,624 |
|          | O7                  | -0,659                  | -0,658 | -0,657 | -0,661 | -0,659 | -0,661 |
|          | O3'                 | -0,706                  | -0,671 | -0,706 | -0,701 | -0,707 | -0,703 |
|          | O4'                 | -0,663                  | -0,699 | -0,663 | -0,662 | -0,666 | -0,665 |

e = 1,602\*10<sup>-19</sup> C



**Table S11. The cytotoxic activity of studied compounds in relation to different cancer cell lines**

| Compound             | Parameters                           | Cell lines                           | Ref. |      |
|----------------------|--------------------------------------|--------------------------------------|------|------|
| Chromone             | -                                    | -                                    | -    |      |
| Flavone              | IC50 > 50.000 nM                     | A549                                 | [1]  |      |
| 3-Hydroxyflavone     | LC50=40.4 μM                         | TIG-1                                | [2]  |      |
|                      | LC50= 64.0 μM                        | HUVEC                                |      |      |
|                      | IC50= 20 ± 2 μM                      | B16 melanoma cells/ Lewis lung cells | [3]  |      |
| 3,7-Dihydroxyflavone | GI50=17.4 ± 2.0 μM                   | MCF-7                                | [4]  |      |
|                      | GI50=15.4 ± 1.2 μM                   | NCI-H460                             |      |      |
|                      | GI50=23.0 ± 1.0 μM                   | A375-C5                              |      |      |
| Galangin             | IC50= 48 ± 4 μM                      | B16 melanoma cells/ Lewis lung cells | [3]  |      |
|                      | IC50=275.48 μM                       | V79                                  | [5]  |      |
|                      | IC50=145.0 μmol/L <sup>a</sup>       | B16F10                               | [6]  |      |
| Kaempferol           | LC50=221 μM                          | TIG-1                                | [2]  |      |
|                      | LC50=167 μM                          | HUVEC                                | [3]  |      |
|                      | IC50= 51 ± 5 μM                      | B16 melanoma cells/ Lewis lung cells |      |      |
|                      | IC50= 31 ± 8 μM                      | EAhy 926 endothelial cells           |      |      |
|                      | IC50=30.92 ±0.05 μM                  | HepG2                                | [7]  |      |
|                      | IC50=88.02 ±001 μM                   | CT26                                 |      |      |
| IC50=70.62 ±0.05 μM  | B16F1                                |                                      |      |      |
| Quercetin            | LC50=4.45mM                          | RAW264.7                             | [8]  |      |
|                      | IC50=118.1±5.55 μM <sup>a</sup>      | CT-26                                | [9]  |      |
|                      | IC50=110.7±4.30 μM <sup>a</sup>      | LNCaP                                |      |      |
|                      | IC50>120 μM μM <sup>a</sup>          | PC3                                  |      |      |
|                      | IC50=99.3±6.11 μM <sup>a</sup>       | PC12                                 |      |      |
|                      | IC50=105.4±5.2 μM <sup>a</sup>       | MCF-7                                |      |      |
|                      | IC50=64.9±3.5 μM <sup>a</sup>        | MOLT-4                               |      |      |
|                      | IC50=54.3±4.5 μM <sup>a</sup>        | U266B1                               |      |      |
|                      | IC50=66.5±3.57 μM <sup>a</sup>       | Raji                                 |      |      |
|                      | IC50=>120 μM <sup>a</sup>            | CHO                                  |      |      |
|                      | IC50=50 μM                           | PC3                                  |      |      |
|                      | IC50=50 μM                           | LNCaP                                |      | [10] |
|                      | IC50= 35.5±1.1 μM                    | HeLa                                 |      | [11] |
|                      | IC50=20.9±0.9 μM                     | NIH-3T3                              |      |      |
| LC50= 303 μM         | TIG-1                                | [2]                                  |      |      |
| LC50= 61.0 μM        | HUVE                                 |                                      |      |      |
| IC50= 26 ± 4 μM      | B16 melanoma cells/ Lewis lung cells | [3]                                  |      |      |
| IC50= 36 ± 2 μM      | EAhy 926 endothelial cells           |                                      |      |      |

<sup>a</sup>for 24h

1. Bible KC, Kaufmann SH. Flavopiridol: a cytotoxic flavone that induces cell death in noncycling A549 human lung carcinoma cells. *Cancer Res.* 1996;56: 4856–61. Available: <http://www.ncbi.nlm.nih.gov/pubmed/8895733>
2. Matsuo M, Sasaki N, Saga K, Kaneko T. Cytotoxicity of flavonoids toward cultured normal human cells. *Biol Pharm Bull.* 2005;28: 253–9. Available: <http://www.ncbi.nlm.nih.gov/pubmed/15684479>
3. Touil YS, Fellous A, Scherman D, Chabot GG. Flavonoid-induced morphological modifications of endothelial cells through microtubule stabilization. *Nutr Cancer.* 2009;61: 310–21. doi:10.1080/01635580802521346
4. Neves MP, Cidade H, Pinto M, Silva AMS, Gales L, Damas AM, et al. Prenylated derivatives of baicalein and 3,7-dihydroxyflavone: Synthesis and study of their effects on tumor cell lines growth, cell cycle and apoptosis. *Eur J Med Chem.* 2011;46: 2562–2574. doi:10.1016/J.EJMECH.2011.03.047

5. Bacanlı M, Başaran AA, Başaran N. The antioxidant, cytotoxic, and antigenotoxic effects of galangin, puerarin, and ursolic acid in mammalian cells. *Drug Chem Toxicol.* 2017;40: 256–262. doi:10.1080/01480545.2016.1209680
6. Zhang W, Lan Y, Huang Q, Hua Z. Galangin induces B16F10 melanoma cell apoptosis via mitochondrial pathway and sustained activation of p38 MAPK. *Cytotechnology.* 2013;65: 447–55. doi:10.1007/s10616-012-9499-1
7. Wang J, Fang X, Ge L, Cao F, Zhao L, Wang Z, et al. Antitumor, antioxidant and anti-inflammatory activities of kaempferol and its corresponding glycosides and the enzymatic preparation of kaempferol. Pizzo S V, editor. *PLoS One.* 2018;13: e0197563. doi:10.1371/journal.pone.0197563
8. Murakami Y, Kawata A, Ito S, Katayama T, Fujisawa S. Radical-scavenging and Anti-inflammatory Activity of Quercetin and Related Compounds and Their Combinations Against RAW264.7 Cells Stimulated with *Porphyromonas gingivalis* Fimbriae. Relationships between Anti-inflammatory Activity and Quantum Chemical Par. *In Vivo.* 2015;29: 701–10. Available: <http://www.ncbi.nlm.nih.gov/pubmed/26546527>
9. Hashemzai M, Delarami Far A, Yari A, Heravi RE, Tabrizian K, Taghdisi SM, et al. Anticancer and apoptosis-inducing effects of quercetin in vitro and in vivo. *Oncol Rep.* 2017;38: 819–828. doi:10.3892/or.2017.5766
10. Shenouda NS, Zhou C, Browning JD, Ansell PJ, Sakla MS, Lubahn DB, et al. Phytoestrogens in Common Herbs Regulate Prostate Cancer Cell Growth in Vitro. *Nutr Cancer.* 2004;49: 200–208. doi:10.1207/s15327914nc4902\_12
11. Danihelová M, Veverka M, Sturdík E, Jantová S. Antioxidant action and cytotoxicity on HeLa and NIH-3T3 cells
